# Supplementary material for: Validation of Forest Vegetation Simulator Model Finds Overprediction of Carbon Growth in California
Source: MDPI journal article supplement (doi:10.3390/f14030604), 2023-03-17
Supplement: s1 [file s1]

Archive with 1 entries (1 files):
- forests-2247352-supplementary.pdf
