# Supplementary figures and images for: Validation of Forest Vegetation Simulator Model Finds Overprediction of Carbon Growth in California
Source: MDPI journal article supplement (doi:10.3390/f14030604), 2023-03-17

# PNW-FIA Plot Design

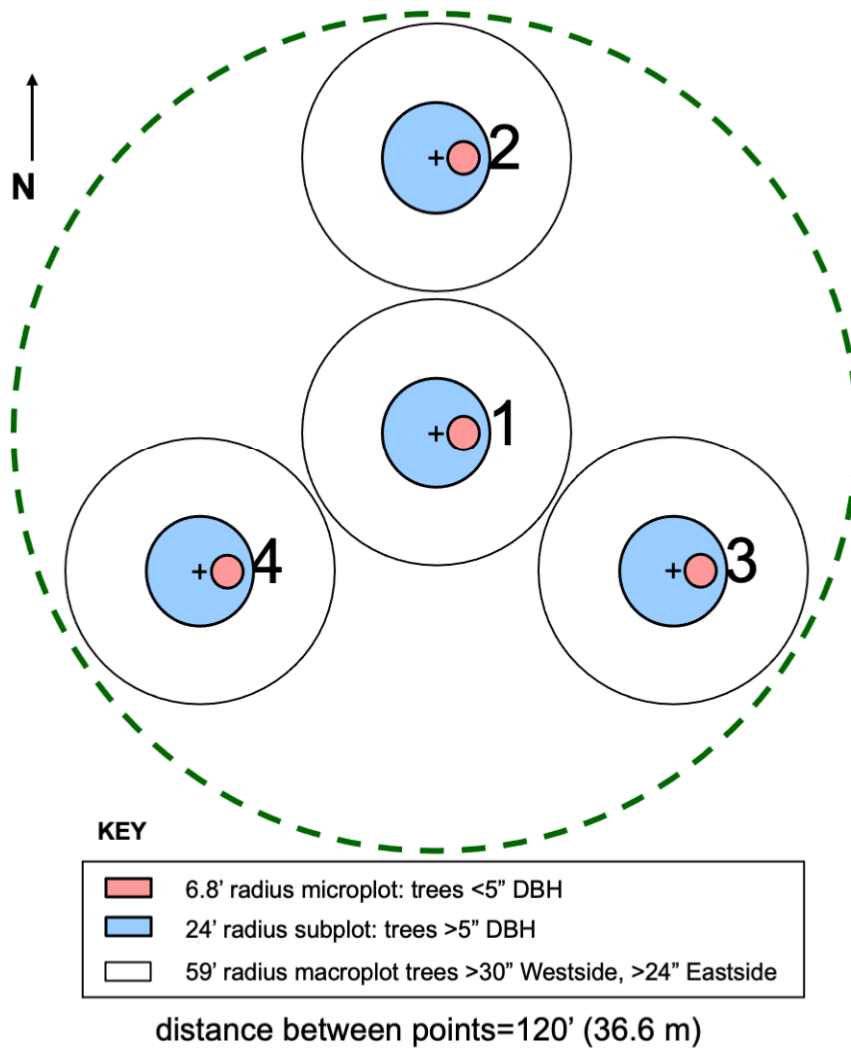

**Figure S1.** Diagram of sampling method used in FIA plots.

Supplement: s1 [file s1 › forests-2247352-supplementary.pdf]
